# Supplementary material for: Lipases Immobilization for Effective Synthesis of Biodiesel Starting from Coffee Waste Oils
Source: Biomolecules. 2013 Aug 13;3(3):514–34. doi: 10.3390/biom3030514 (PMC4030945; doi:10.3390/biom3030514)
Supplement: Supplementary File 1 — Supplementary Information (DOC, 598 KB) [file biomolecules-03-00514-s001.doc]

**ELECTRONIC SUPPLEMENTARY INFORMATION**

Lipases Immobilization for Effective Synthesis of Biodiesel Starting from Coffee Waste Oils

Valerio Ferrario 1, Harumi Veny 2, Elisabetta De Angelis 3, Luciano Navarini 3, Cynthia Ebert 1, and Lucia Gardossi 1,*

1 Dipartimento di Scienze Chimiche e Farmaceutiche, Università degli Studi di Trieste, Piazzale Europa 1, Trieste 34127, Italy; E-Mails: vferrario@units.it (V.F.); ebert@units.it (C.E.)

2Department of Chemical Engineering, Faculty of Engineering, University of Malaya, Malaysia;
E-Mail: my_harumi@yahoo.com (H.V.)

3illycaffè S.p.A., via Flavia 110, Trieste 34147, Italy;
E-Mails: elisabetta.deangelis@illy.com (E.D.A.); luciano.navarini@illy.com (L.N.)

**Figure S1.** H1 NMR spectra of methanolysis reaction at time = 0 (left) and after 6 h. Methanolysis was catalyzed by PcL-S and one equivalent of methanol was added at time 0, 100 min, 200 min.

**Figure S2.** H1 NMR of the product of transesterification catalyzed by CaL-S with a oil:methanol molar ratio of 1:1.

**Figure S3.** Pictures of oil from espresso spent coffee ground (left) and the mixture obtained after enzymatic methanolysis (right).

| 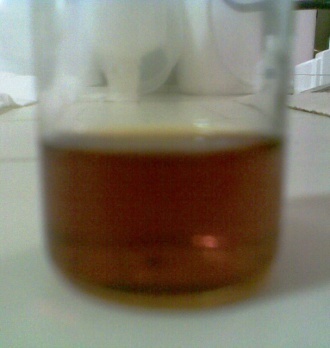 | 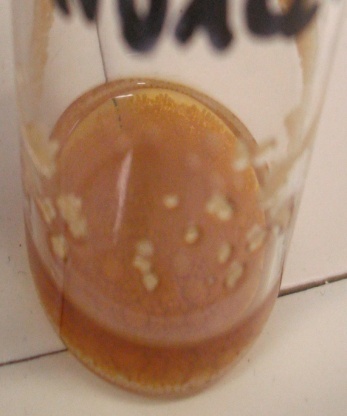 |
| --- | --- |

**Figure S4. GC-MS profiles of fatty acids present in the oil from spent coffee (A) and the products (B) obtained after 30 h of methanolysis catalyzed by CaL-S at 30 °C and with equimolar additions of methanol at time = 0, 100 min and 200 min.**

| 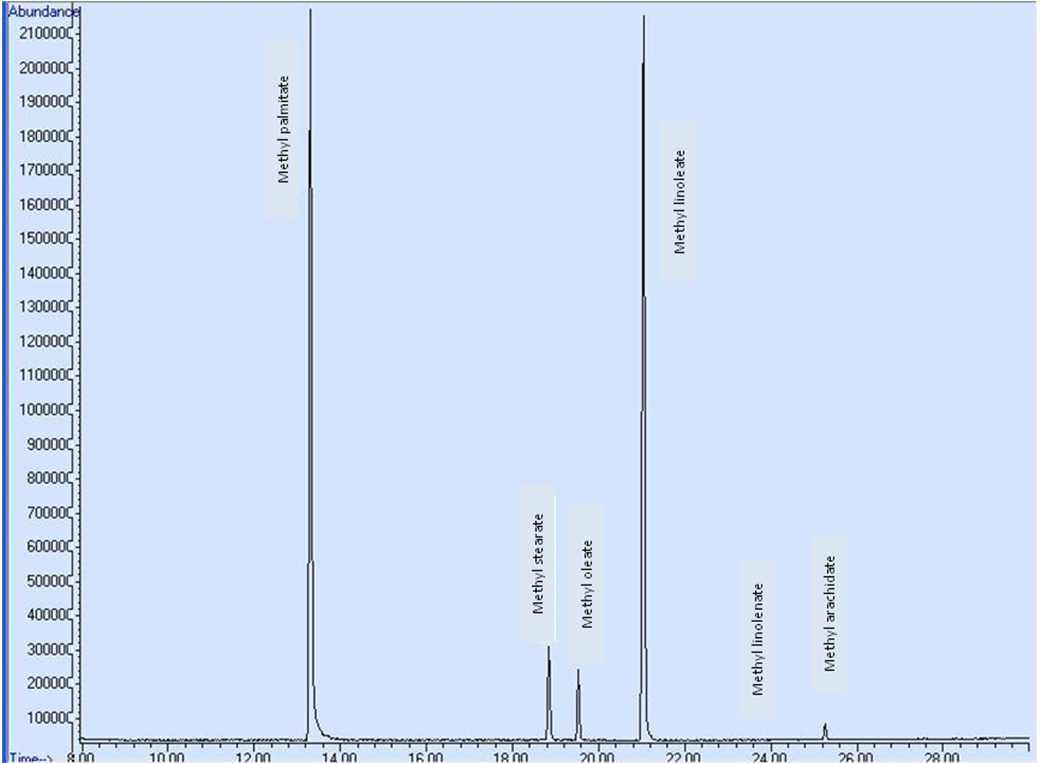 |
| --- |
| (**A**) |
|  |
| (**B**) |
